# Supplementary material for: Circular RNA circASPM promotes the progression of glioblastoma by acting as a competing endogenous RNA to regulate miR-130b-3p/E2F1 axis
Source: PubMed Central journal article supplement (PMC8965134; doi:10.7150/jca.57691), 2022-03-14
Supplement: jcav13p1664s1.pdf [file jcav13p1664s1.pdf]

## Supplementary figure 1

Isolation and validation of patient derived glioma stem cells.

a: H&E-stained images of the original patient tumors of GSC11, GSC12, GSC14, GSC16, GSC17 and GSC18.

b: GSCs adhered and differentiated into GFAP- or  $\beta$ -III tubulin-positive cells. Scale bar = 50  $\mu$ m.

c: Neurospheres composed of CD133<sup>+</sup> / Nestin<sup>+</sup> GSCs were isolated from the primary culture. Scale bar = 50  $\mu$ m.

d: PLOD1 mRNA expression in patient-derived GSCs as measured by qPCR.

e, f: qPCR assays detected the expression level of ASPM founding that overexpression and knockdown of circASPM did not affect the RNA expression level of ASPM.

All data are shown as the mean  $\pm$  SD (three independent experiments). \*P < 0.05; \*\*P < 0.01; \*\*\*P < 0.001.

## Supplementary figure 2

circASPM promotes the proliferation of U87 via miR-130b-3p/E2F1 axis.

a: The expression of circASPM in U87 after transfection of the circASPM overexpression plasmids as measured by qPCR.

b: circASPM overexpression significantly increased the proliferation of U87 in MTS assays.

c, d : Proliferative capacity of tumor cells was inhibited after circASPM overexpression in U87 as measured by Edu assays. Scale bar = 50 $\mu$ m.

e, f: The expression of miR-130b-3p was down-regulated after circAPSM overexpression while circASPM knockdown up-regulated miR-130b-3p expression as measured by qPCR in U87.

g: The luciferase reporter assays showed that miR-130b-3p inhibitor altered the luciferase promoter activities of circASPM in U87.

h: The luciferase reporter assays showed that miR-130b-3p inhibitor altered the luciferase promoter activities of E2F1.

i, j: qPCR and western blot showed the expression of E2F1 in GSCs after miR-130b-3p inhibitor treatment.

k: MTS assays showed that circASPM transfection of overexpression plasmids affected GSCs viability and was reversed by miR-130b-3p mimic treatment.

l: MTS assays showed that the GSCs viability regulated by circASPM overexpression treatment were reversed by E2F1 knockdown in U87.

All data are shown as the mean  $\pm$  SD (three independent experiments). \*P < 0.05; \*\*P < 0.01; \*\*\*P < 0.001.

### Supplementary figure 3

The expression levels of miR-130b-3p and E2F1 in glioma tissues and cells

a: MiR-130b-3p expression was correlated with WHO grades in glioma.

b: E2F1 expression was negatively correlated with WHO grades in glioma.

c: Mir-130b-3p mRNA expression in patient-derived GSCs as measured by qPCR.

d: E2F1 mRNA expression in patient-derived GSCs as measured by qPCR.

e, f: E2F1 protein expression in glioma tissues as measured by western blotting (e) and immunohistochemistry (f).

g: E2F1 protein expression in patient-derived GSCs as measured by western blotting.

All data are shown as the mean  $\pm$  SD (three independent experiments). \*P < 0.05; \*\*P < 0.01; \*\*\*P < 0.001.

### Supplementary figure 4

a: The difference expression of circASPM between human glioma tissues and mice xenograft tumor tissues (GSC11 and GSC18).

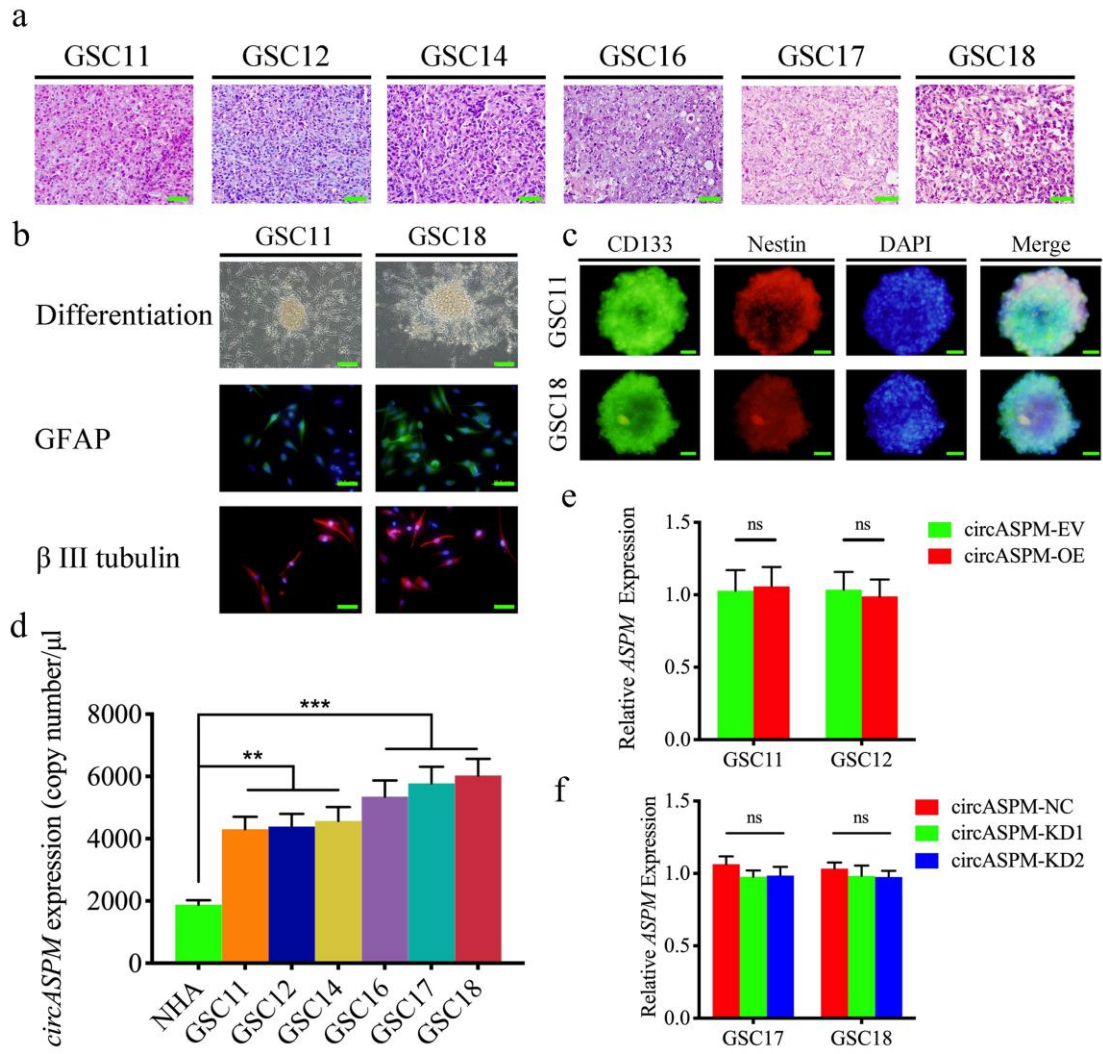

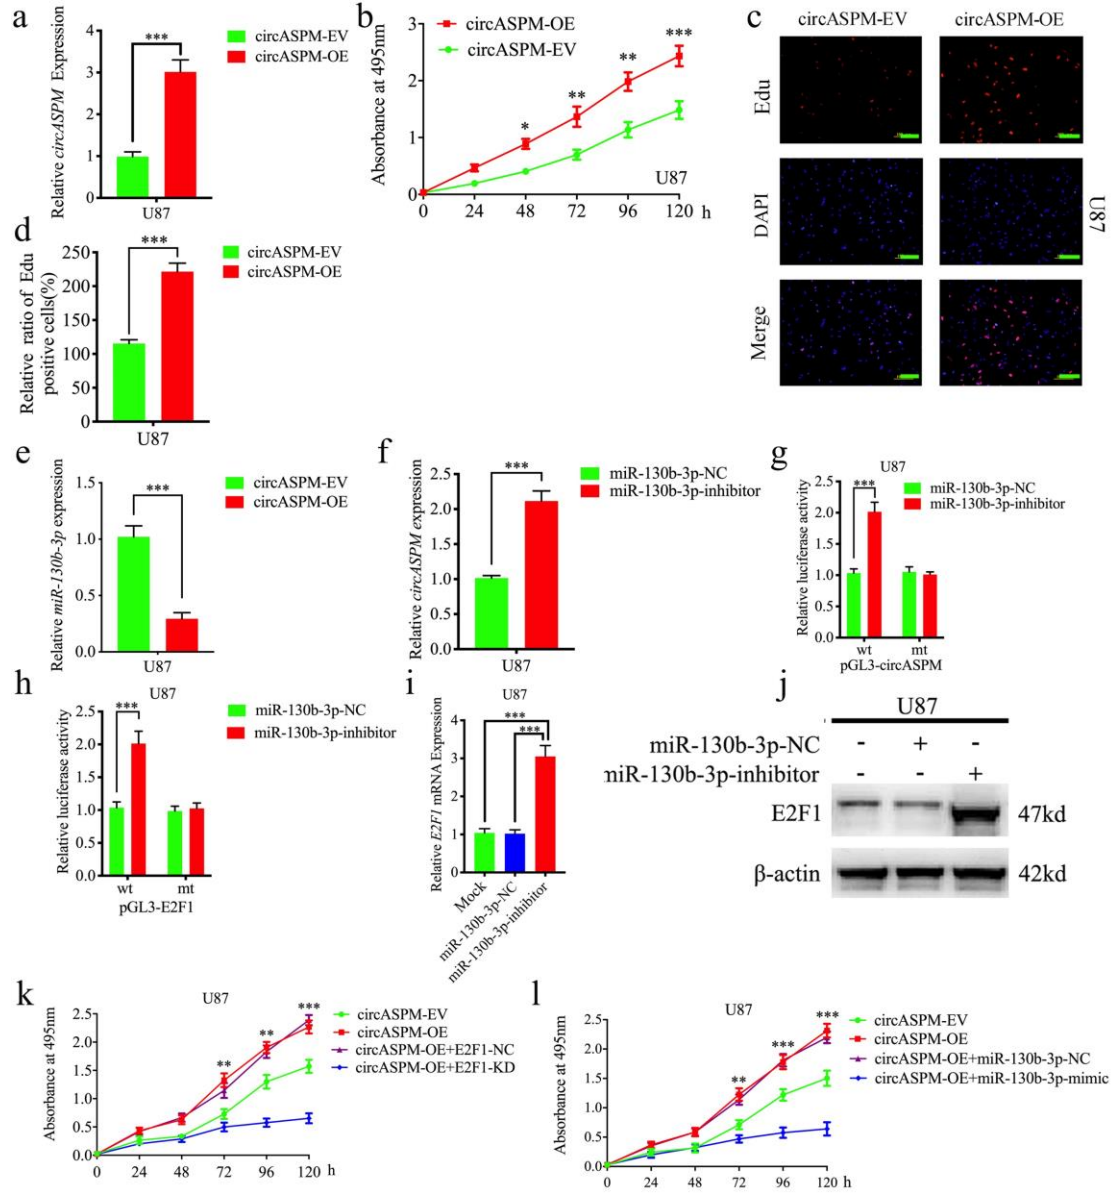

**a**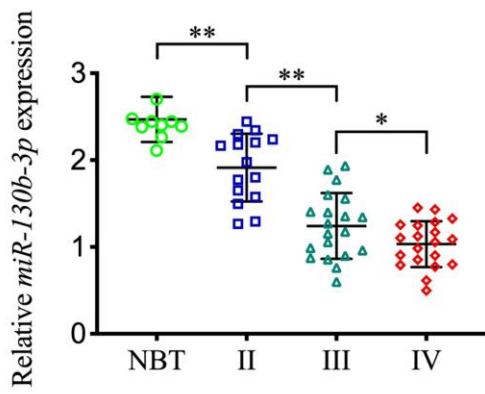**b**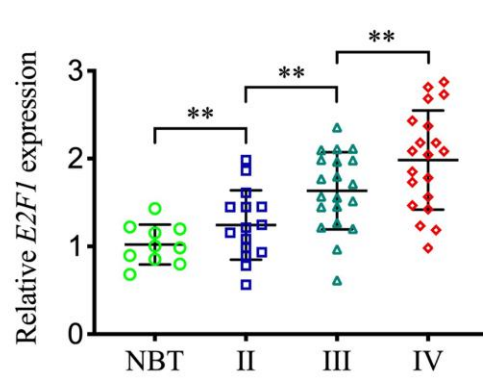**c**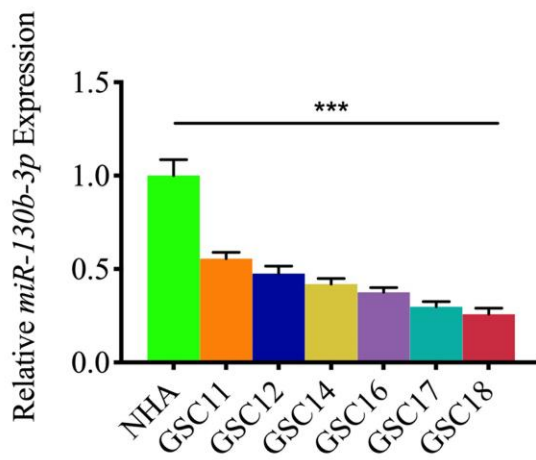**d**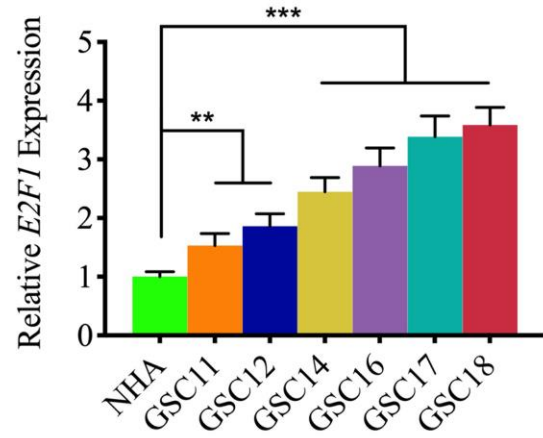**e**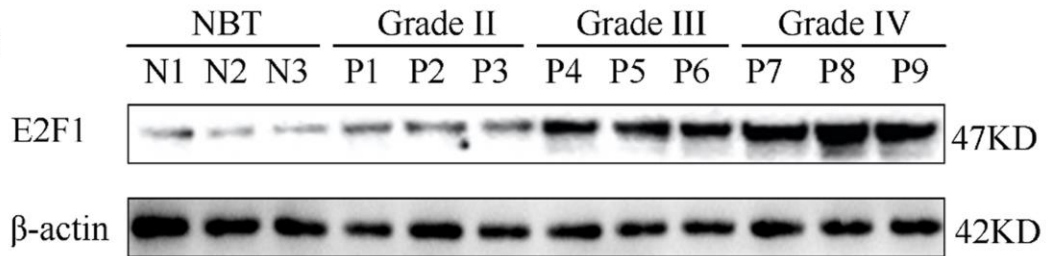**f**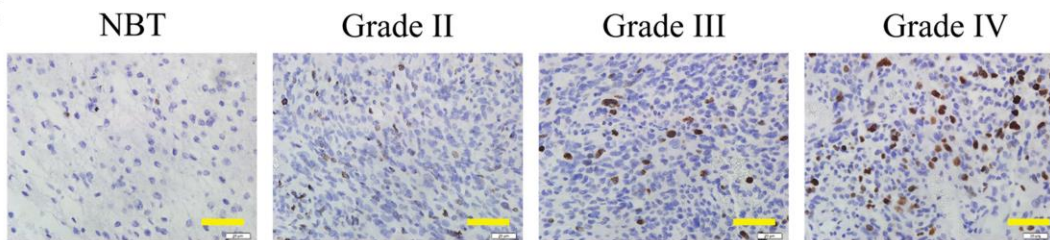**g**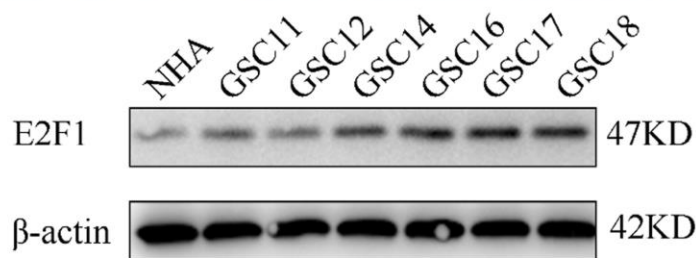

a

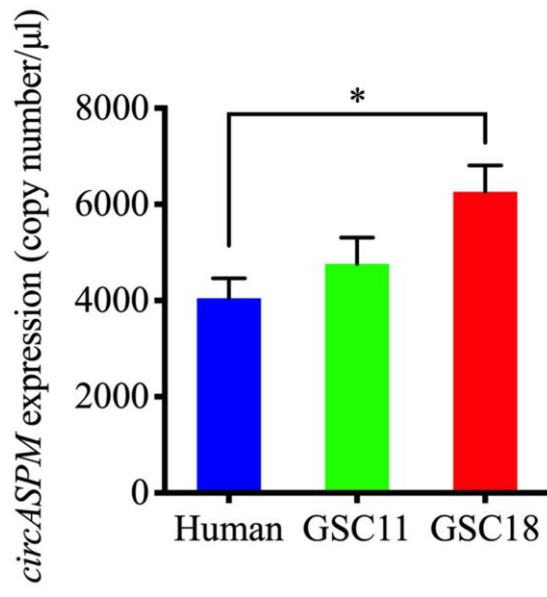

**Table S1.** Relationship of circASPM expression to clinical features of glioma patients.

| Clinical features |        | Samples<br>( <i>n</i> = 55) | circASPM expression  |                       | <i>P</i> value |
|-------------------|--------|-----------------------------|----------------------|-----------------------|----------------|
|                   |        |                             | Low ( <i>n</i> = 24) | High ( <i>n</i> = 31) |                |
| Sex               | Male   | 27                          | 11                   | 16                    | 0.6707         |
|                   | Female | 28                          | 13                   | 15                    |                |
| Age               | ≤ 50   | 30                          | 11                   | 19                    | 0.2536         |
|                   | > 50   | 25                          | 13                   | 12                    |                |
| WHO<br>grade      | II     | 15                          | 11                   | 4                     | <b>0.0159</b>  |
|                   | III    | 20                          | 8                    | 12                    |                |
|                   | IV     | 20                          | 5                    | 15                    |                |

CircASPM expression was detected by immunohistochemistry and evaluated according to the German immunohistochemical score. High expression was defined as score  $\geq 4$ .

**Supplementary Table 2. Clinical information of the primary glioma stem-like cells**

|           | GSC11              | GSC12        | GSC14               | GSC16               | GSC17        | GSC18              |
|-----------|--------------------|--------------|---------------------|---------------------|--------------|--------------------|
| Gender    | Male               | Female       | Female              | Female              | Male         | Male               |
| Age       | 66 years old       | 68 years old | 53 years old        | 36 years old        | 58 years old | 37 years old       |
| Location  | Left parietal lobe | Right insula | Right parietal lobe | Left occipital lobe | Right insula | Left parietal lobe |
| WHO grade | IV                 | IV           | IV                  | IV                  | IV           | IV                 |
| Ki-67     | 40% (+)            | 40% (+)      | 60% (+)             | 60% (+)             | 70% (+)      | 60% (+)            |
